# Supplementary material for: First-Principles Molecular Dynamics Simulations on Water–Solid Interface Behavior of H2O-Based Atomic Layer Deposition of Zirconium Dioxide
Source: MDPI journal article supplement (doi:10.3390/nano12244362), 2022-12-07
Supplement: s1 [file s1]

## Supplementary Material

# First-Principles Molecular Dynamics Simulations on Water–Solid Interface Behavior of H<sub>2</sub>O-Based Atomic Layer Deposition of Zirconium Dioxide

Rui Xu <sup>1</sup>, Zhongchao Zhou <sup>1</sup>, Yingying Wang <sup>1</sup>, Hongping Xiao <sup>1</sup>, Lina Xu <sup>1,\*</sup>, Yihong Ding <sup>1</sup>, Xinhua Li <sup>1</sup>, Aidong Li <sup>2</sup> and Guoyong Fang <sup>1,\*</sup>

<sup>1</sup> Key Laboratory of Carbon Materials of Zhejiang Province, College of Chemistry and Materials Engineering, Wenzhou University, Wenzhou 325035, China

<sup>2</sup> National Laboratory of Solid State Microstructures, College of Engineering and Applied Sciences, Nanjing University, Nanjing 210093, China

\* Correspondence: xulina@wzu.edu.cn (L.X.); fanggy@wzu.edu.cn (G.F.)

## Content

**Figure S1** Radial distribution functions (RDFs) and their integrated RDFs of the interface reaction between the first layer water and  $\text{ZrO}_2$  surface on the five-layer  $\text{ZrO}_2$  model.

**Table S1** Atomic coordinates of 2-layer  $\text{ZrO}_2$  substrate.

**Table S2** Atomic coordinates of 3-layer  $\text{ZrO}_2$  substrate.

**Table S3** Atomic coordinates of 4-layer  $\text{ZrO}_2$  substrate.

**Table S4** Atomic coordinates of 5-layer  $\text{ZrO}_2$  substrate.

**Table S5** Atomic coordinates of 3-layer  $\text{ZrO}_2$  substrate 55 waters.

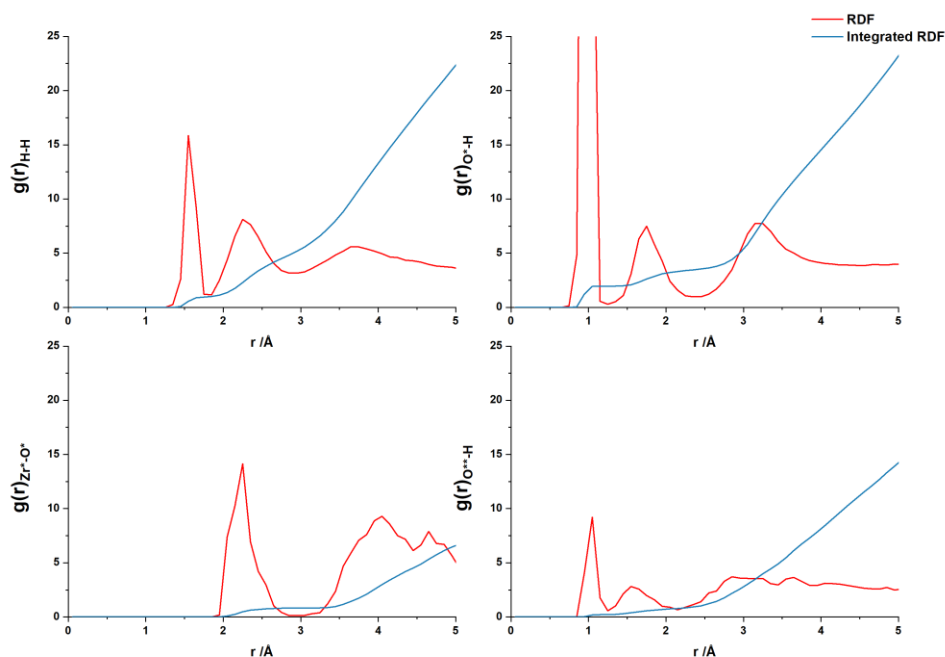

**Figure S1** Radial distribution functions (RDFs) and their integrated RDFs of five-layer  $\text{ZrO}_2$  model.  $g(r)_{\text{H-H}}$  between H atoms in the water molecule (a),  $g(r)_{\text{O}^*\text{-H}}$  between O atoms in the water molecule and H atoms in the water molecule (b),

$g(r)_{\text{Zr}^*-\text{O}^*}$  between Zr atoms on the surface of  $\text{ZrO}_2$  and O atoms in the water molecule

(c) and  $g(r)_{\text{O}^*-\text{H}}$  between O atoms on the surface of  $\text{ZrO}_2$  and H atoms in the water molecule (d).

**Table S1** Atomic coordinates of 2-layer ZrO<sub>2</sub> substrate

|           |               |              |               |
|-----------|---------------|--------------|---------------|
| ZrO2_2    |               |              |               |
| 1.0       |               |              |               |
|           | 13.3698997498 | 0.0000000000 | 0.0000000000  |
|           | 0.7368347366  | 7.4012122236 | 0.0000000000  |
|           | 0.0000000000  | 0.0000000000 | 25.2518005371 |
| Zr        | O             |              |               |
| 16        | 32            |              |               |
| Cartesian |               |              |               |
|           | 6.053911234   | 6.539044964  | 2.005498007   |
|           | 3.096552434   | 3.010285094  | 4.919045587   |
|           | 12.370443741  | 2.838438852  | 2.005498007   |
|           | 10.149919655  | 6.710890985  | 4.919045587   |
|           | 1.706319432   | 0.684094068  | 2.096152038   |
|           | 8.759686471   | 4.384700125  | 2.096152038   |
|           | 6.026418488   | 0.854646041  | 4.983791156   |
|           | 13.079785742  | 4.555252263  | 4.983791156   |
|           | 2.241506500   | 4.066891920  | 1.862825364   |
|           | 8.558038826   | 0.366286001  | 1.862825364   |
|           | 6.371726887   | 4.076581264  | 4.683281741   |
|           | 12.688259363  | 0.375974849  | 4.683281741   |
|           | 5.852137069   | 2.520704760  | 1.772171333   |

|              |             |             |
|--------------|-------------|-------------|
| 3.868424212  | 6.374288169 | 4.573114522 |
| 12.905504312 | 6.221310871 | 1.772171333 |
| 10.184956143 | 2.673682278 | 4.573114522 |
| 4.107730155  | 6.911160524 | 2.518243348 |
| 1.287448534  | 3.354980965 | 5.626581709 |
| 10.424263082 | 3.210554633 | 2.518243348 |
| 8.340815577  | 7.055587077 | 5.626581709 |
| 6.604547215  | 4.496015976 | 2.373695885 |
| 3.938707508  | 0.897409140 | 5.382616815 |
| 12.921079340 | 0.795410030 | 2.373695885 |
| 10.992074795 | 4.598015693 | 5.382616815 |
| 2.452574104  | 2.284845275 | 3.127773094 |
| 9.505941702  | 5.985450946 | 3.127773094 |
| 6.671597166  | 2.512946976 | 5.899967649 |
| 13.724963989 | 6.213552867 | 5.899967649 |
| 6.506656467  | 0.630672866 | 2.951299868 |
| 4.438999778  | 4.571057223 | 5.631052681 |
| 13.560023716 | 4.331279033 | 2.951299868 |
| 10.755532273 | 0.870451001 | 5.631052681 |
| 4.086715020  | 3.429277777 | 1.233550454 |
| 1.360709830  | 0.088043520 | 4.139301865 |
| 11.140082640 | 7.129883668 | 1.233550454 |

|              |             |             |
|--------------|-------------|-------------|
| 8.414077580  | 3.788649714 | 4.139301865 |
| 1.695480609  | 6.102817564 | 1.434302280 |
| 8.012013016  | 2.402211453 | 1.434302280 |
| 5.937466176  | 6.193024550 | 4.223421774 |
| 12.253998262 | 2.492418218 | 4.223421774 |
| 5.202830262  | 0.878967943 | 0.727756906 |
| 2.876785068  | 4.749263696 | 3.698377118 |
| 12.256197499 | 4.579573999 | 0.727756906 |
| 9.193317386  | 1.048657694 | 3.698377118 |
| 0.948947184  | 2.532324782 | 0.986840401 |
| 8.002314007  | 6.232930674 | 0.986840401 |
| 5.238656712  | 2.674876241 | 3.775167447 |
| 12.292024000 | 6.375482794 | 3.775167447 |

**Table S2** Atomic coordinates of 3-layer ZrO<sub>2</sub> substrate

|                     |              |               |
|---------------------|--------------|---------------|
| ZrO <sub>2</sub> _3 |              |               |
| 1.0                 |              |               |
| 13.3698997498       | 0.0000000000 | 0.0000000000  |
| 0.7368347366        | 7.4012122236 | 0.0000000000  |
| 0.0000000000        | 0.0000000000 | 28.0905990601 |
| Zr                  | O            |               |
| 24                  | 48           |               |

Cartesian

|              |             |             |
|--------------|-------------|-------------|
| 1.765640884  | 6.373775998 | 1.987128961 |
| 8.082172992  | 2.673169886 | 1.987128961 |
| 6.031256346  | 6.482460410 | 4.880540198 |
| 3.110545299  | 3.016356154 | 7.738651114 |
| 12.347788454 | 2.781854298 | 4.880540198 |
| 10.163912963 | 6.716962486 | 7.738651114 |
| 4.471550399  | 4.219431159 | 2.077861541 |
| 1.669172845  | 0.671688804 | 4.986156109 |
| 10.788082900 | 0.518824992 | 2.077861541 |
| 8.722539607  | 4.372295081 | 4.986156109 |
| 6.003352368  | 0.846997495 | 7.790594696 |
| 13.056719617 | 4.547603662 | 7.790594696 |
| 4.269768863  | 0.201016924 | 1.844709599 |
| 2.223774448  | 4.055170654 | 4.684262657 |
| 11.323136098 | 3.901622953 | 1.844709599 |
| 8.540306581  | 0.354564790 | 4.684262657 |
| 6.352721322  | 4.056400570 | 7.535910658 |
| 12.669253015 | 0.355794293 | 7.535910658 |
| 1.564000499  | 2.355435794 | 1.753696150 |
| 8.617367443  | 6.056041905 | 1.753696150 |
| 5.813455977  | 2.458469117 | 4.562973342 |

|              |             |             |
|--------------|-------------|-------------|
| 3.852796072  | 6.388742779 | 7.474131223 |
| 12.866823220 | 6.159075229 | 4.562973342 |
| 10.169328601 | 2.688136888 | 7.474131223 |
| 6.142545646  | 3.083359047 | 2.447554063 |
| 4.122488931  | 6.986168244 | 5.512046893 |
| 1.308331149  | 3.395897976 | 8.416951570 |
| 13.195912889 | 6.783965159 | 2.447554063 |
| 10.439022213 | 3.285561912 | 5.512046893 |
| 8.361698271  | 7.096503868 | 8.416951570 |
| 2.301238706  | 4.345528510 | 2.366958924 |
| 8.617771423  | 0.644922508 | 2.366958924 |
| 6.618483374  | 4.446725781 | 5.295693715 |
| 3.923722515  | 0.910921627 | 8.228526637 |
| 12.935015897 | 0.746119835 | 5.295693715 |
| 10.977089786 | 4.611528014 | 8.228526637 |
| 5.191962766  | 5.808395865 | 3.132608977 |
| 2.455323485  | 2.304018831 | 5.908833007 |
| 11.508494875 | 2.107789754 | 3.132608977 |
| 9.508690529  | 6.004624943 | 5.908833007 |
| 6.583127589  | 2.478678926 | 8.758032719 |
| 13.636494433 | 6.179285038 | 8.758032719 |
| 2.233092328  | 0.454498287 | 2.943793716 |



|              |             |             |
|--------------|-------------|-------------|
| 9.286459579  | 4.155104481 | 2.943793716 |
| 6.529637024  | 0.649096693 | 5.723015844 |
| 4.404096228  | 4.545164563 | 8.483525449 |
| 13.583003853 | 4.349702639 | 5.723015844 |
| 10.720629521 | 0.844558341 | 8.483525449 |
| 6.851945771  | 6.964614702 | 1.215199333 |
| 4.109452707  | 3.555745912 | 4.038023531 |
| 1.339700249  | 0.059917320 | 7.109912505 |
| 13.168478278 | 3.264008590 | 1.215199333 |
| 11.162820348 | 7.256352024 | 4.038023531 |
| 8.393068100  | 3.760523529 | 7.109912505 |
| 3.723876546  | 2.236942487 | 1.416047063 |
| 1.599627624  | 6.057151389 | 4.211030813 |
| 10.777244187 | 5.937548598 | 1.416047063 |
| 7.916160109  | 2.356545057 | 4.211030813 |
| 5.961208345  | 6.180087925 | 7.134455674 |
| 12.277740453 | 2.479481813 | 7.134455674 |
| 0.914559906  | 0.713698922 | 0.709287651 |
| 7.967927547  | 4.414305033 | 0.709287651 |
| 5.024953489  | 0.834997480 | 3.666380833 |
| 2.928349074  | 4.757210952 | 6.471500036 |
| 12.078321131 | 4.535603592 | 3.666380833 |

|              |             |             |
|--------------|-------------|-------------|
| 9.244881193  | 1.056604951 | 6.471500036 |
| 3.714044254  | 6.067661708 | 0.968563906 |
| 0.971345470  | 2.513473264 | 3.841023098 |
| 10.030576561 | 2.367055596 | 0.968563906 |
| 8.024712641  | 6.214079155 | 3.841023098 |
| 5.205057283  | 2.662667288 | 6.584494719 |
| 12.258424548 | 6.363273620 | 6.584494719 |

**Table S3** Atomic coordinates of 4-layer ZrO<sub>2</sub> substrate.

|               |              |               |
|---------------|--------------|---------------|
| ZrO2_4        |              |               |
| 1.0           |              |               |
| 13.3698997498 | 0.0000000000 | 0.0000000000  |
| 0.7368347366  | 7.4012122236 | 0.0000000000  |
| 0.0000000000  | 0.0000000000 | 30.9293994904 |
| Zr            | O            |               |
| 32            | 64           |               |
| Direct        |              |               |
| 0.265089989   | 0.338849992  | 0.065130003   |
| 0.081281401   | 0.858739555  | 0.158556074   |
| 0.765089989   | 0.838850021  | 0.065130003   |
| 0.581281364   | 0.358739555  | 0.158556074   |
| 0.401672155   | 0.876958013  | 0.251208812   |

|             |             |             |
|-------------|-------------|-------------|
| 0.208299726 | 0.408661872 | 0.344038367 |
| 0.901672184 | 0.376957983 | 0.251208812 |
| 0.708299696 | 0.908661842 | 0.344038367 |
| 0.483520001 | 0.047770001 | 0.068070002 |
| 0.300120145 | 0.569904685 | 0.160696134 |
| 0.117677435 | 0.089774728 | 0.254667014 |
| 0.983519971 | 0.547770023 | 0.068070002 |
| 0.800120115 | 0.069904670 | 0.160696134 |
| 0.617677391 | 0.589774728 | 0.254667014 |
| 0.440553159 | 0.116057396 | 0.345856994 |
| 0.940553188 | 0.616057396 | 0.345856994 |
| 0.498349994 | 0.504830003 | 0.060520001 |
| 0.315760911 | 0.024372872 | 0.152600586 |
| 0.135021374 | 0.545625091 | 0.245221913 |
| 0.998350024 | 0.004830000 | 0.060520001 |
| 0.815760911 | 0.524372876 | 0.152600586 |
| 0.635021389 | 0.045625135 | 0.245221913 |
| 0.443273097 | 0.549162984 | 0.337672293 |
| 0.943273067 | 0.049162939 | 0.337672293 |
| 0.279929996 | 0.795920014 | 0.057580002 |
| 0.097221680 | 0.312522948 | 0.150195941 |
| 0.779929996 | 0.295920014 | 0.057580002 |

|             |             |             |
|-------------|-------------|-------------|
| 0.597221673 | 0.812522948 | 0.150195941 |
| 0.415301174 | 0.332732171 | 0.241803318 |
| 0.239375845 | 0.863570452 | 0.335084498 |
| 0.915301204 | 0.832732141 | 0.241803318 |
| 0.739375830 | 0.363570452 | 0.335084498 |
| 0.117613547 | 0.399083465 | 0.081092745 |
| 0.617613554 | 0.899083495 | 0.081092745 |
| 0.437042534 | 0.432707906 | 0.177992851 |
| 0.255664051 | 0.947919488 | 0.271293253 |
| 0.070826821 | 0.461379290 | 0.366075248 |
| 0.937042534 | 0.932707906 | 0.177992851 |
| 0.755664051 | 0.447919518 | 0.271293253 |
| 0.570826828 | 0.961379230 | 0.366075248 |
| 0.320426673 | 0.065154560 | 0.077727646 |
| 0.139899984 | 0.583789587 | 0.171892449 |
| 0.820426643 | 0.565154552 | 0.077727646 |
| 0.639900029 | 0.083789580 | 0.171892449 |
| 0.459420592 | 0.602360964 | 0.265259653 |
| 0.284524441 | 0.123598337 | 0.359894753 |
| 0.959420562 | 0.102360994 | 0.265259653 |
| 0.784524441 | 0.623598397 | 0.359894753 |
| 0.023950234 | 0.764072001 | 0.102276556 |

|             |             |             |
|-------------|-------------|-------------|
| 0.523950279 | 0.264071971 | 0.102276556 |
| 0.342372090 | 0.788417697 | 0.193574309 |
| 0.161505893 | 0.310324073 | 0.285537183 |
| 0.842372060 | 0.288417697 | 0.193574309 |
| 0.661505878 | 0.810324013 | 0.285537183 |
| 0.472524375 | 0.336301833 | 0.377257884 |
| 0.972524345 | 0.836301804 | 0.377257884 |
| 0.344549149 | 0.539035082 | 0.095374949 |
| 0.164805099 | 0.066873610 | 0.186910331 |
| 0.844549119 | 0.039035074 | 0.095374949 |
| 0.664805055 | 0.566873610 | 0.186910331 |
| 0.481123894 | 0.087432139 | 0.278835684 |
| 0.293816805 | 0.616187394 | 0.368200660 |
| 0.981123865 | 0.587432146 | 0.278835684 |
| 0.793816805 | 0.116187401 | 0.368200660 |
| 0.141120002 | 0.918680012 | 0.040169999 |
| 0.641120017 | 0.418680012 | 0.040169999 |
| 0.460611045 | 0.954544604 | 0.131906807 |
| 0.277938187 | 0.469387949 | 0.225353017 |
| 0.097995251 | 0.005423663 | 0.322837710 |
| 0.960611045 | 0.454544604 | 0.131906807 |
| 0.777938187 | 0.969387949 | 0.225353017 |

|             |             |             |
|-------------|-------------|-------------|
| 0.597995281 | 0.505423665 | 0.322837710 |
| 0.442360014 | 0.779910028 | 0.046659999 |
| 0.255310744 | 0.295898587 | 0.137492880 |
| 0.076060325 | 0.818808079 | 0.231054395 |
| 0.942359984 | 0.279909998 | 0.046659999 |
| 0.755310774 | 0.795898557 | 0.137492880 |
| 0.576060295 | 0.318808079 | 0.231054395 |
| 0.398113191 | 0.836350739 | 0.324313402 |
| 0.898113191 | 0.336350739 | 0.324313402 |
| 0.243579999 | 0.574100018 | 0.023820000 |
| 0.053226847 | 0.094299652 | 0.118925810 |
| 0.743579984 | 0.074100003 | 0.023820000 |
| 0.553226888 | 0.594299674 | 0.118925810 |
| 0.373929530 | 0.112163015 | 0.210060567 |
| 0.183955207 | 0.642224967 | 0.302669376 |
| 0.873929560 | 0.612163007 | 0.210060567 |
| 0.683955193 | 0.142224997 | 0.302669376 |
| 0.413100004 | 0.297490001 | 0.032200001 |
| 0.235297740 | 0.818150938 | 0.124789290 |
| 0.050721988 | 0.337317616 | 0.217489138 |
| 0.913100004 | 0.797490001 | 0.032200001 |
| 0.735297740 | 0.318150938 | 0.124789290 |

|             |             |             |
|-------------|-------------|-------------|
| 0.550721943 | 0.837317586 | 0.217489138 |
| 0.367773026 | 0.360264391 | 0.307359070 |
| 0.867772996 | 0.860264421 | 0.307359070 |

**Table S4** Atomic coordinates of 5-layer ZrO<sub>2</sub> substrate.

|               |              |               |
|---------------|--------------|---------------|
| ZrO2_5        |              |               |
| 1.0           |              |               |
| 13.3698997498 | 0.0000000000 | 0.0000000000  |
| 0.7368347366  | 7.4012122236 | 0.0000000000  |
| 0.0000000000  | 0.0000000000 | 33.7681999207 |
| Zr            | O            |               |
| 40            | 80           |               |
| Direct        |              |               |
| 0.445589989   | 0.816519976  | 0.037840001   |
| 0.265089989   | 0.338849992  | 0.121909998   |
| 0.084600002   | 0.861180007  | 0.205970004   |
| 0.945590019   | 0.316520005  | 0.037840001   |
| 0.765089989   | 0.838850021  | 0.121909998   |
| 0.584599972   | 0.361180007  | 0.205970004   |
| 0.404110014   | 0.883509994  | 0.290039986   |
| 0.223619998   | 0.405849993  | 0.374110013   |
| 0.904110014   | 0.383509994  | 0.290039986   |

|             |             |             |
|-------------|-------------|-------------|
| 0.723619998 | 0.905849993 | 0.374110013 |
| 0.164010003 | 0.025440000 | 0.040530000 |
| 0.664009988 | 0.525439978 | 0.040530000 |
| 0.483520001 | 0.047770001 | 0.124600001 |
| 0.303030014 | 0.570100009 | 0.208660007 |
| 0.122529998 | 0.092430003 | 0.292730004 |
| 0.983519971 | 0.547770023 | 0.124600001 |
| 0.803030014 | 0.070100002 | 0.208660007 |
| 0.622529984 | 0.592429996 | 0.292730004 |
| 0.442039996 | 0.114759997 | 0.376800001 |
| 0.942040026 | 0.614759982 | 0.376800001 |
| 0.178849995 | 0.482499987 | 0.033620000 |
| 0.678849995 | 0.982500017 | 0.033620000 |
| 0.498349994 | 0.504830003 | 0.117689997 |
| 0.317860007 | 0.027160000 | 0.201749995 |
| 0.137370005 | 0.549489975 | 0.285820007 |
| 0.998350024 | 0.004830000 | 0.117689997 |
| 0.817860007 | 0.527159989 | 0.201749995 |
| 0.637369990 | 0.049490001 | 0.285820007 |
| 0.456880003 | 0.571820021 | 0.369890004 |
| 0.956879973 | 0.071819998 | 0.369890004 |
| 0.460420012 | 0.273589998 | 0.030929999 |



|             |             |             |
|-------------|-------------|-------------|
| 0.279929996 | 0.795920014 | 0.115000002 |
| 0.099440001 | 0.318250000 | 0.199059993 |
| 0.960420012 | 0.773590028 | 0.030929999 |
| 0.779929996 | 0.295920014 | 0.115000002 |
| 0.599439979 | 0.818250000 | 0.199059993 |
| 0.418940008 | 0.340579987 | 0.283129990 |
| 0.238450006 | 0.862909973 | 0.367199987 |
| 0.918940008 | 0.840579987 | 0.283129990 |
| 0.738449991 | 0.362910002 | 0.367199987 |
| 0.302819997 | 0.902670026 | 0.056480002 |
| 0.122330002 | 0.425000012 | 0.140540004 |
| 0.802820027 | 0.402669996 | 0.056480002 |
| 0.622330010 | 0.925000012 | 0.140540004 |
| 0.441839993 | 0.447329998 | 0.224610001 |
| 0.261339992 | 0.969669998 | 0.308679998 |
| 0.080849998 | 0.492000014 | 0.392749995 |
| 0.941839993 | 0.947329998 | 0.224610001 |
| 0.761340022 | 0.469669998 | 0.308679998 |
| 0.580850005 | 0.991999984 | 0.392749995 |
| 0.001580000 | 0.041439999 | 0.050530002 |
| 0.501580000 | 0.541440010 | 0.050530002 |
| 0.321090013 | 0.063770004 | 0.134599999 |

|             |             |             |
|-------------|-------------|-------------|
| 0.140599996 | 0.586109996 | 0.218669996 |
| 0.821089983 | 0.563769996 | 0.134599999 |
| 0.640600026 | 0.086110003 | 0.218669996 |
| 0.460099995 | 0.608439982 | 0.302740008 |
| 0.279610008 | 0.130769998 | 0.386799991 |
| 0.960099995 | 0.108439997 | 0.302740008 |
| 0.779609978 | 0.630770028 | 0.386799991 |
| 0.200360000 | 0.247250006 | 0.071460001 |
| 0.019859999 | 0.769580007 | 0.155520007 |
| 0.700360000 | 0.747250021 | 0.071460001 |
| 0.519860029 | 0.269580007 | 0.155520007 |
| 0.339370012 | 0.791909993 | 0.239590004 |
| 0.158879995 | 0.314240009 | 0.323659986 |
| 0.839370012 | 0.291909993 | 0.239590004 |
| 0.658879995 | 0.814239979 | 0.323659986 |
| 0.478390008 | 0.336580008 | 0.407730013 |
| 0.978389978 | 0.836579978 | 0.407730013 |
| 0.030840000 | 0.523859978 | 0.063780002 |
| 0.530839980 | 0.023860000 | 0.063780002 |
| 0.350340009 | 0.546190023 | 0.147850007 |
| 0.169850007 | 0.068520002 | 0.231920004 |
| 0.850340009 | 0.046190001 | 0.147850007 |

|             |             |             |
|-------------|-------------|-------------|
| 0.669849992 | 0.568520010 | 0.231920004 |
| 0.489360005 | 0.090860002 | 0.315979987 |
| 0.308869988 | 0.613189995 | 0.400050014 |
| 0.989359975 | 0.590860009 | 0.315979987 |
| 0.808870018 | 0.113190003 | 0.400050014 |
| 0.321610004 | 0.396349996 | 0.014980000 |
| 0.141120002 | 0.918680012 | 0.099050000 |
| 0.821609974 | 0.896350026 | 0.014980000 |
| 0.641120017 | 0.418680012 | 0.099050000 |
| 0.460630000 | 0.941009998 | 0.183119997 |
| 0.280129999 | 0.463340014 | 0.267179996 |
| 0.099639997 | 0.985669971 | 0.351249993 |
| 0.960630000 | 0.441009998 | 0.183119997 |
| 0.780130029 | 0.963339984 | 0.267179996 |
| 0.599640012 | 0.485670000 | 0.351249993 |
| 0.122850001 | 0.757579982 | 0.020919999 |
| 0.622850001 | 0.257580012 | 0.020919999 |
| 0.442360014 | 0.779910028 | 0.104989998 |
| 0.261869997 | 0.302240014 | 0.189060003 |
| 0.081370004 | 0.824570000 | 0.273130000 |
| 0.942359984 | 0.279909998 | 0.104989998 |
| 0.761870027 | 0.802240014 | 0.189060003 |

|             |             |             |
|-------------|-------------|-------------|
| 0.581369996 | 0.324570000 | 0.273130000 |
| 0.400880009 | 0.846899986 | 0.357190013 |
| 0.900879979 | 0.346899986 | 0.357190013 |
| 0.424080014 | 0.051770002 | 0.000000000 |
| 0.243579999 | 0.574100018 | 0.084069997 |
| 0.063089997 | 0.096430004 | 0.168139994 |
| 0.924080014 | 0.551769972 | 0.000000000 |
| 0.743579984 | 0.074100003 | 0.084069997 |
| 0.563090026 | 0.596430004 | 0.168139994 |
| 0.382600009 | 0.118759997 | 0.252200007 |
| 0.202110007 | 0.641089976 | 0.336270005 |
| 0.882600009 | 0.618759990 | 0.252200007 |
| 0.702109993 | 0.141090006 | 0.336270005 |
| 0.093599997 | 0.275160015 | 0.007680000 |
| 0.593599975 | 0.775160015 | 0.007680000 |
| 0.413100004 | 0.297490001 | 0.091739997 |
| 0.232610002 | 0.819819987 | 0.175809994 |
| 0.052120000 | 0.342150003 | 0.259880006 |
| 0.913100004 | 0.797490001 | 0.091739997 |
| 0.732609987 | 0.319819987 | 0.175809994 |
| 0.552119970 | 0.842149973 | 0.259880006 |
| 0.371630013 | 0.364479989 | 0.343950003 |

|             |             |             |
|-------------|-------------|-------------|
| 0.871630013 | 0.864480019 | 0.343950003 |
|-------------|-------------|-------------|

**Table S5** Atomic coordinates of 3-layer ZrO<sub>2</sub> substrate 55 waters.

|            |               |              |               |
|------------|---------------|--------------|---------------|
| ZrO2_3_H2O |               |              |               |
| 1.0        |               |              |               |
|            | 13.3849000931 | 0.0000000000 | 0.0000000000  |
|            | 0.3679334631  | 7.4097707366 | 0.0000000000  |
|            | 0.0000000000  | 0.0000000000 | 29.3668003082 |
| O          | H             | Zr           |               |
| 103        | 110           | 24           |               |
| Direct     |               |              |               |
|            | 0.269927055   | 0.249232650  | 0.147246912   |
|            | 0.575825512   | 0.477526098  | 0.503127337   |
|            | 0.526521206   | 0.738670707  | 0.437544078   |
|            | 0.980632067   | 0.719191074  | 0.118247636   |
|            | 0.113621846   | 0.813443482  | 0.422109663   |
|            | 0.621419907   | 0.096191898  | 0.589543521   |
|            | 0.695391536   | 0.596496582  | 0.107669577   |
|            | 0.599495173   | 0.579717517  | 0.206534564   |
|            | 0.384490699   | 0.939312696  | 0.583393335   |
|            | 0.164949924   | 0.023006292  | 0.198039785   |
|            | 0.606706679   | 0.962872386  | 0.163158953   |

|             |             |             |
|-------------|-------------|-------------|
| 0.260983795 | 0.747459888 | 0.237141311 |
| 0.874694765 | 0.580532610 | 0.493748695 |
| 0.564058006 | 0.689767957 | 0.346103460 |
| 0.874921501 | 0.214320123 | 0.508036435 |
| 0.065945826 | 0.362076819 | 0.142482489 |
| 0.851144016 | 0.294450909 | 0.238863379 |
| 0.552332699 | 0.946769834 | 0.270393789 |
| 0.201030359 | 0.254914939 | 0.266140103 |
| 0.392943203 | 0.184508204 | 0.284445882 |
| 0.945271313 | 0.279057860 | 0.322249770 |
| 0.291288853 | 0.531355977 | 0.554732144 |
| 0.693829715 | 0.649717271 | 0.566670775 |
| 0.323916644 | 0.866639495 | 0.319780201 |
| 0.985788345 | 0.513978660 | 0.417426407 |
| 0.548580110 | 0.776864290 | 0.622021317 |
| 0.382330418 | 0.538095951 | 0.183631465 |
| 0.739869893 | 0.881065667 | 0.028500812 |
| 0.442848265 | 0.042747293 | 0.113463528 |
| 0.101161666 | 0.548304915 | 0.225744933 |
| 0.831039190 | 0.842400789 | 0.240890205 |
| 0.915922046 | 0.255281776 | 0.062340252 |
| 0.060298737 | 0.583289146 | 0.314350843 |

|             |             |             |
|-------------|-------------|-------------|
| 0.517997921 | 0.001574615 | 0.506330311 |
| 0.250526428 | 0.882603168 | 0.500046790 |
| 0.427831411 | 0.285391659 | 0.598716855 |
| 0.035166282 | 0.173593611 | 0.565871298 |
| 0.193017289 | 0.239394635 | 0.515910625 |
| 0.179474100 | 0.755340517 | 0.611307085 |
| 0.214778587 | 0.481116831 | 0.373444647 |
| 0.725579917 | 0.138559803 | 0.104590066 |
| 0.834165871 | 0.165477097 | 0.419135064 |
| 0.112360269 | 0.228882983 | 0.431920469 |
| 0.808745205 | 0.960566044 | 0.565632701 |
| 0.394136995 | 0.506777287 | 0.333230317 |
| 0.832512856 | 0.482830226 | 0.621314228 |
| 0.724566281 | 0.101359069 | 0.289821506 |
| 0.969254196 | 0.698529422 | 0.579547107 |
| 0.381120205 | 0.693103552 | 0.095216714 |
| 0.523349702 | 0.445007503 | 0.084474631 |
| 0.967168808 | 0.983071864 | 0.186177447 |
| 0.012998209 | 0.926356316 | 0.341063380 |
| 0.326287806 | 0.830970883 | 0.412753254 |
| 0.816101789 | 0.892054617 | 0.357297152 |
| 0.746417224 | 0.595487833 | 0.317837596 |

|             |             |             |
|-------------|-------------|-------------|
| 0.437314957 | 0.437445581 | 0.766051352 |
| 0.257683724 | 0.979646444 | 0.872204602 |
| 0.071901515 | 0.505962133 | 0.969227791 |
| 0.937946081 | 0.940918922 | 0.766866744 |
| 0.758771181 | 0.476100922 | 0.871039689 |
| 0.565810919 | 0.002886477 | 0.969389737 |
| 0.133346736 | 0.594106317 | 0.763573527 |
| 0.633022785 | 0.093548141 | 0.763306379 |
| 0.457538873 | 0.609882116 | 0.863204777 |
| 0.280356050 | 0.129758984 | 0.963602483 |
| 0.958613276 | 0.111578815 | 0.863564670 |
| 0.784696817 | 0.624612093 | 0.962228954 |
| 0.332936972 | 0.789538383 | 0.792100251 |
| 0.146460906 | 0.330309302 | 0.887791574 |
| 0.836864114 | 0.291799784 | 0.791589320 |
| 0.648081958 | 0.828685701 | 0.888577521 |
| 0.457780033 | 0.359480619 | 0.982963383 |
| 0.949378490 | 0.859735608 | 0.985812902 |
| 0.166819811 | 0.076216996 | 0.784422100 |
| 0.665485740 | 0.577271044 | 0.784216523 |
| 0.479824364 | 0.102793008 | 0.877569735 |
| 0.290079653 | 0.632174373 | 0.973226368 |



|             |             |             |
|-------------|-------------|-------------|
| 0.982282221 | 0.604304433 | 0.877169132 |
| 0.791856885 | 0.140015602 | 0.970598459 |
| 0.462104321 | 0.940535545 | 0.722162068 |
| 0.273796052 | 0.460728347 | 0.818445563 |
| 0.093286484 | 0.997488201 | 0.925237060 |
| 0.963588953 | 0.443551660 | 0.721037507 |
| 0.773914993 | 0.966481745 | 0.819444060 |
| 0.594383538 | 0.503398776 | 0.924292862 |
| 0.249186516 | 0.312099636 | 0.726949215 |
| 0.074927077 | 0.831537545 | 0.827678084 |
| 0.751326144 | 0.811824679 | 0.728099525 |
| 0.573786795 | 0.330130696 | 0.826952696 |
| 0.398014635 | 0.847777128 | 0.927107871 |
| 0.901787817 | 0.350172013 | 0.926289499 |
| 0.072389327 | 0.082680151 | 0.707659304 |
| 0.571430862 | 0.588018715 | 0.707175434 |
| 0.384198487 | 0.110485360 | 0.803403914 |
| 0.200554788 | 0.650514901 | 0.897992969 |
| 0.884801447 | 0.614075720 | 0.803070724 |
| 0.692609966 | 0.152300477 | 0.899538159 |
| 0.240944758 | 0.810110331 | 0.717070937 |
| 0.051749285 | 0.338997483 | 0.812985539 |

|             |             |             |
|-------------|-------------|-------------|
| 0.741209507 | 0.312543303 | 0.718626976 |
| 0.550836504 | 0.839594483 | 0.813736320 |
| 0.364388704 | 0.366396934 | 0.906201363 |
| 0.867656052 | 0.867187977 | 0.906703591 |
| 0.307105571 | 0.333959699 | 0.166083083 |
| 0.240090698 | 0.160193697 | 0.168178916 |
| 0.588475704 | 0.347671360 | 0.500608087 |
| 0.624380350 | 0.523718059 | 0.525173485 |
| 0.543388903 | 0.630716562 | 0.456614733 |
| 0.532744825 | 0.841041684 | 0.459051907 |
| 0.000864288 | 0.594414532 | 0.126405895 |
| 0.937722564 | 0.709037840 | 0.091779090 |
| 0.072891735 | 0.705550790 | 0.421731710 |
| 0.180640638 | 0.768311620 | 0.411966473 |
| 0.693430901 | 0.064580649 | 0.585446358 |
| 0.598501384 | 0.997707307 | 0.608966827 |
| 0.675357103 | 0.670558274 | 0.134086639 |
| 0.712622225 | 0.681260467 | 0.083699368 |
| 0.654337466 | 0.511901557 | 0.221625283 |
| 0.598544061 | 0.699418783 | 0.220512047 |
| 0.314223766 | 0.912530839 | 0.587091982 |
| 0.390595496 | 0.071333565 | 0.589849591 |

|             |             |             |
|-------------|-------------|-------------|
| 0.092827156 | 0.993880749 | 0.195796803 |
| 0.203316748 | 0.914672971 | 0.210526049 |
| 0.597382486 | 0.981041253 | 0.195871741 |
| 0.540252507 | 0.995425701 | 0.148479953 |
| 0.316830754 | 0.676120162 | 0.222078204 |
| 0.279288679 | 0.781861067 | 0.268747717 |
| 0.906563461 | 0.563928723 | 0.463238657 |
| 0.809046924 | 0.639493346 | 0.488571137 |
| 0.562120795 | 0.727463424 | 0.378675699 |
| 0.509781420 | 0.603146434 | 0.344297856 |
| 0.865250766 | 0.347856104 | 0.507762849 |
| 0.865110278 | 0.179039672 | 0.475369930 |
| 0.138591304 | 0.329555035 | 0.138457090 |
| 0.038685858 | 0.255451113 | 0.156428695 |
| 0.797841668 | 0.222319797 | 0.252035528 |
| 0.882052898 | 0.218476191 | 0.214970544 |
| 0.546051562 | 0.862716496 | 0.296324342 |
| 0.493079156 | 0.033425659 | 0.272703260 |
| 0.181031331 | 0.164752066 | 0.243247420 |
| 0.170537949 | 0.368321627 | 0.253590614 |
| 0.322888196 | 0.215276152 | 0.273054004 |
| 0.407188058 | 0.294357210 | 0.302113742 |

|             |             |             |
|-------------|-------------|-------------|
| 0.990007520 | 0.381275594 | 0.320708334 |
| 0.914723516 | 0.281262606 | 0.291117847 |
| 0.303755581 | 0.631702840 | 0.534071207 |
| 0.252031416 | 0.593203068 | 0.579477727 |
| 0.635583162 | 0.691861808 | 0.586346209 |
| 0.729879975 | 0.760449827 | 0.560528815 |
| 0.314340413 | 0.868691504 | 0.353344887 |
| 0.351352870 | 0.984592259 | 0.311862826 |
| 0.027563527 | 0.398426920 | 0.422058374 |
| 0.964760303 | 0.513608217 | 0.385617107 |
| 0.542604268 | 0.702444494 | 0.649657369 |
| 0.480472952 | 0.816044629 | 0.610701621 |
| 0.454108685 | 0.524375021 | 0.190946683 |
| 0.378498822 | 0.600053072 | 0.153665274 |
| 0.723107338 | 0.991187453 | 0.046690326 |
| 0.813297868 | 0.880820155 | 0.024232833 |
| 0.421362936 | 0.923215985 | 0.103481412 |
| 0.381550699 | 0.108979374 | 0.124466062 |
| 0.083629720 | 0.501310825 | 0.195554957 |
| 0.159375161 | 0.626318455 | 0.223619685 |
| 0.791262627 | 0.936055422 | 0.258341640 |
| 0.824907720 | 0.731088400 | 0.258133978 |

|             |             |             |
|-------------|-------------|-------------|
| 0.966910660 | 0.284588188 | 0.084588237 |
| 0.863115489 | 0.201270431 | 0.080234610 |
| 0.067198299 | 0.567922533 | 0.280844033 |
| 0.042406108 | 0.713708639 | 0.318696111 |
| 0.456121266 | 0.969116211 | 0.521612644 |
| 0.561843514 | 0.026904928 | 0.532455325 |
| 0.187063217 | 0.851270556 | 0.486280978 |
| 0.239281878 | 0.010383335 | 0.509854436 |
| 0.392857581 | 0.380103499 | 0.580160141 |
| 0.498200029 | 0.277989239 | 0.589469790 |
| 0.978748918 | 0.188939661 | 0.543808639 |
| 0.016385637 | 0.248002231 | 0.592060089 |
| 0.230358541 | 0.342502117 | 0.527127385 |
| 0.135603920 | 0.225368619 | 0.537527204 |
| 0.178727955 | 0.781845272 | 0.643929243 |
| 0.109087065 | 0.750607252 | 0.601711512 |
| 0.191586211 | 0.371120989 | 0.387656450 |
| 0.165263310 | 0.512703776 | 0.349189758 |
| 0.689993024 | 0.074220225 | 0.129325986 |
| 0.713779986 | 0.266492605 | 0.111473665 |
| 0.818211973 | 0.054546591 | 0.402461410 |
| 0.866279840 | 0.238550350 | 0.396271229 |

|             |             |             |
|-------------|-------------|-------------|
| 0.100040980 | 0.100334741 | 0.429061443 |
| 0.144282058 | 0.241104648 | 0.462724566 |
| 0.870421648 | 0.892989278 | 0.575363934 |
| 0.830189586 | 0.054326482 | 0.543859005 |
| 0.333890736 | 0.482759088 | 0.352340668 |
| 0.374646276 | 0.626099467 | 0.320116282 |
| 0.822464943 | 0.355408728 | 0.626228929 |
| 0.775107920 | 0.528677642 | 0.601887345 |
| 0.752744675 | 0.039521705 | 0.317464858 |
| 0.656680286 | 0.054130726 | 0.284184366 |
| 0.930326939 | 0.609129548 | 0.596268833 |
| 0.957994998 | 0.666782439 | 0.547508359 |
| 0.325359493 | 0.674737632 | 0.074715339 |
| 0.433160454 | 0.593762636 | 0.087635212 |
| 0.589976609 | 0.485224158 | 0.093840763 |
| 0.523084342 | 0.313946843 | 0.083074532 |
| 0.964162886 | 0.900217533 | 0.159800276 |
| 0.924433410 | 0.923953116 | 0.209371567 |
| 0.053861734 | 0.914571464 | 0.369048446 |
| 0.006412951 | 0.055627346 | 0.331826329 |
| 0.306951672 | 0.879520774 | 0.443099529 |
| 0.393694341 | 0.774140596 | 0.418454468 |

|             |             |             |
|-------------|-------------|-------------|
| 0.889166355 | 0.892786622 | 0.350487918 |
| 0.794818521 | 0.771083593 | 0.347343951 |
| 0.675200522 | 0.613601863 | 0.328948915 |
| 0.765750468 | 0.468342155 | 0.322020710 |
| 0.092075042 | 0.879552424 | 0.752866864 |
| 0.592658699 | 0.380290836 | 0.751721740 |
| 0.399645329 | 0.883744478 | 0.850381732 |
| 0.204078212 | 0.429316700 | 0.947021902 |
| 0.901593626 | 0.384870350 | 0.849885702 |
| 0.700042248 | 0.932367086 | 0.949630439 |
| 0.295509994 | 0.562106073 | 0.752752364 |
| 0.118204147 | 0.101606742 | 0.853855789 |
| 0.795309365 | 0.066164173 | 0.753843307 |
| 0.618635833 | 0.602246642 | 0.854060709 |
| 0.433737040 | 0.137555867 | 0.947558522 |
| 0.936665714 | 0.635679245 | 0.947500467 |
| 0.329120547 | 0.011211901 | 0.743853867 |
| 0.132706285 | 0.558031738 | 0.840509653 |
| 0.830273926 | 0.515113652 | 0.742794454 |
| 0.632086694 | 0.057926230 | 0.841936171 |
| 0.440312803 | 0.562227190 | 0.938551486 |
| 0.938710988 | 0.064494662 | 0.940100133 |

|             |             |             |
|-------------|-------------|-------------|
| 0.096256152 | 0.305469930 | 0.743159950 |
| 0.597720504 | 0.809032440 | 0.744357884 |
| 0.413747638 | 0.339140296 | 0.837144434 |
| 0.236358479 | 0.876348913 | 0.938130856 |
| 0.914188206 | 0.841014981 | 0.837629914 |
| 0.739043057 | 0.379238099 | 0.937455773 |
